# Supplementary material for: Nutritional Risk and Sarcopenia Features in Patients with Crohn’s Disease: Relation to Body Composition, Physical Performance, Nutritional Questionnaires and Biomarkers
Source: MDPI journal article supplement (doi:10.3390/nu15163615), 2023-08-17
Supplement: s1 [file s1]

**Supplementary Table S1:** Spearman correlation coefficients between MNA score, MNA sub-scores and body composition/function patterns in patients with remission (subsample of the present study).

|                           | Pattern 1            | Pattern 2    | Pattern 3      | Pattern 4                   | Pattern 5      |
|---------------------------|----------------------|--------------|----------------|-----------------------------|----------------|
|                           | (MAC, FFMI, Max HGS) | (Gait speed) | (CC, MAC, age) | (Chair-standing test, OLST) | (Alb, TSF)     |
| MNA Total score           | 0.215                | 0.110        | <b>0.417</b>   | 0.066                       | 0.178          |
|                           | p=0.312              | p=0.608      | <b>p=0.043</b> | p=0.761                     | p=0.405        |
| MNA Food intake           | 0.306                | 0.092        | 0.332          | 0.366                       | <b>0.455</b>   |
|                           | p=0.147              | p=0.670      | p=0.113        | p=0.078                     | <b>p=0.025</b> |
| MNA weight loss           | <b>-0.404</b>        | 0.291        | -0.048         | -0.162                      | 0.210          |
|                           | <b>p=0.050</b>       | p=0.168      | p=0.822        | p=0.451                     | p=0.325        |
| MNA mobility              | NA                   | NA           | NA             | NA                          | NA             |
| MNA acute stress          | 0.044                | 0.106        | 0.367          | 0.180                       | 0.193          |
|                           | p=0.840              | p=0.623      | p=0.078        | p=0.399                     | p=0.367        |
| MNA neurological problems | 0.256                | -0.045       | 0.346          | -0.166                      | -0.166         |
|                           | p=0.227              | p=0.834      | p=0.097        | p=0.439                     | p=0.439        |
| MNA BMI                   | <b>0.700</b>         | -0.112       | 0.347          | -0.045                      | 0.116          |
|                           | <b>p&lt;0.001</b>    | p=0.602      | p=0.097        | p=0.836                     | p=0.588        |

MAC: Mid arm circumference; FFMI: Fat free mass index; HGS: hand-grip strength; CC: Calf circumference; OLST: One-Legged Stance Test; Alb: Albumin; TSF: Triceps Skinfold; MNA: Mini Nutritional Assessment; BMI: Body Mass Index

NA: Not applicable. It is noted that no variability was detected for MNA-mobility and thus no correlation coefficient could be calculated.
